# Supplementary material
Source: publisher figshare collection journal article supplement (https://karger.figshare.com/ndownloader/files/10168641)
Supplement: Supplementary file 1 [file 10168641]

**Supplementary Table S1. Results of multiple stepwise regression analysis for independence of factors contributing to ΔBCVAM12**

|  |  |  | **ΔBCVAM12** | | |
| --- | --- | --- | --- | --- | --- |
| **Independent** | | | **β** | **95% CI** | **p-value** |
| *ΔBCVAM3* |  |  | 1.25 | 0.73 – 1.78 | 7.22 × 10-5 |
| *Previous vitrectomy* |  |  | 0.28 | 0.13 – 0.43 | 1.05 × 10-3 |
| *Previous PRP* |  |  | -0.15 | -0.30 – -0.01 | 3.91 × 10-2 |
| *Disruption or disappearance of the ELM* | |  | -0.15 | -0.24 – -0.06 | 2.30 × 10-3 |
| BCVA, best-corrected visual acuity; logMAR, logarithm of the minimum angle of resolution; ΔBCVAM3, logMAR BCVA changes from baseline to month 3; ΔBCVAM12, logMAR BCVA changes from baseline to month 12. | | | | | |
